# Supplementary material for: The contribution of mycosporine-like amino acids, chromophoric dissolved organic matter and particles to the UV protection of sea-ice organisms in the Baltic Sea
Source: Royal Society of Chemistry journal article supplement (doi:10.1039/c4pp00342j), 2015-03-24

## Electronic Supplementary Information

**Table S1.** Brine volumes (%), calculated from the ice temperatures measured at 5 cm intervals and bulk salinities of the samples (data not shown), in the untreated ice during the experiment.

| Layer   | 0 d | 7 d | 14 d | 21 d |
|---------|-----|-----|------|------|
| 0-5 cm  | 0.8 | 2.8 | 4.0  | 3.3  |
| 5-10 cm | 1.2 | 1.3 | 5.0  | 2.2  |
| middle  | 1.9 | 3.1 | 8.6  | 2.7  |
| bottom  | 4.0 | 5.8 | 9.1  | 6.4  |

**Table S2.** Carbon specific  $a_{\text{CDOM}}(\lambda=320)$  ( $\text{L mg}^{-1} \text{m}^{-1}$ ) in the treatments from 0 d to 14 d.

| Treatment | Layer   | 0 d  | 7 d  | 14 d |
|-----------|---------|------|------|------|
| UNT       | 0-5 cm  | 0.74 | 0.99 | 0.90 |
|           | 5-10 cm | 0.94 | 1.01 | 0.96 |
|           | middle  | 0.83 | 1.24 | 1.25 |
|           | bottom  | 1.32 | 1.77 | 1.65 |
| PAR       | 0-5 cm  | 0.90 | 1.11 | 1.24 |
|           | 5-10 cm | 0.76 | 0.92 | 0.85 |
|           | middle  | 0.65 | 1.05 | 1.03 |
|           | bottom  | 1.38 | 1.69 | 1.66 |
| PAR+UVR   | 0-5 cm  | 1.00 | 0.94 | 0.79 |
|           | 5-10 cm | 0.47 | 0.88 | 0.87 |
|           | middle  | 0.70 | 1.12 | 1.10 |
|           | bottom  | 1.08 | 1.69 | 1.46 |

## Multiple regression analyses

Following linear regression models were fitted to each layer separately and the insignificant variables were removed by stepwise method

$$y = a + \beta_1x + \beta_2d_1 + \beta_3d_2 + \beta_4d_1*x + \beta_5d_2*x, \text{ where}$$

y= MAA : chl-a ratio normalised to value on 0 d

a = constant

x = day

d<sub>1</sub> and d<sub>2</sub> = dummy variables coding for treatments

d<sub>1</sub>=1 for UNT, d<sub>1</sub>= 0 for PAR and PAR+UVR

d<sub>2</sub> =1 for PAR, d<sub>2</sub> = 0 for UNT and PAR+UVR

β<sub>1-5</sub> = coefficients

**Table S3.** Multiple regression analyses run for each layer (see above for details).

|         |            | ANOVA          |    |             |        |       |                |                                                                        |
|---------|------------|----------------|----|-------------|--------|-------|----------------|------------------------------------------------------------------------|
| Layer   |            | Sum of Squares | df | Mean Square | F      | Sig.  | R <sup>2</sup> | Model                                                                  |
| 0-5 cm  | Regression | .674           | 1  | .674        | 19.281 | 0.003 | .734           | y = 1.39 - 0.335*x                                                     |
|         | Residual   | .245           | 7  | .035        |        |       |                |                                                                        |
|         | Total      | .919           | 8  |             |        |       |                |                                                                        |
| 5-10 cm | Regression | 13.982         | 3  | 4.661       | 11.102 | 0.012 | .869           | y = 0.928 + 1.08*x - 1.136*d <sub>1</sub> *x - 1.26*d <sub>2</sub> *x  |
|         | Residual   | 2.099          | 5  | .420        |        |       |                |                                                                        |
|         | Total      | 16.081         | 8  |             |        |       |                |                                                                        |
| middle  | Regression | 2.751          | 3  | .917        | 10.274 | 0.014 | .860           | y = 1.03 + 0.377*x - 0.542*d <sub>1</sub> *x - 0.544*d <sub>2</sub> *x |
|         | Residual   | .446           | 5  | .089        |        |       |                |                                                                        |
|         | Total      | 3.197          | 8  |             |        |       |                |                                                                        |
| bottom  | Regression | 24.438         | 2  | 12.219      | 6.728  | 0.029 | .692           | y = 0.551 + 1.434*x - 1.424*d <sub>1</sub> *x                          |
|         | Residual   | 10.896         | 6  | 1.816       |        |       |                |                                                                        |
|         | Total      | 35.334         | 8  |             |        |       |                |                                                                        |

**Fig. S1.** The algal absorption spectra ( $m^{-1}$ ) ( $a_{ph} = 0$  at 720 nm) in the 0-5 cm, 5-10 cm, middle and bottom sections of the untreated ice (UNT) and the PAR and PAR+UVR treatments from 0 d to 14 d.

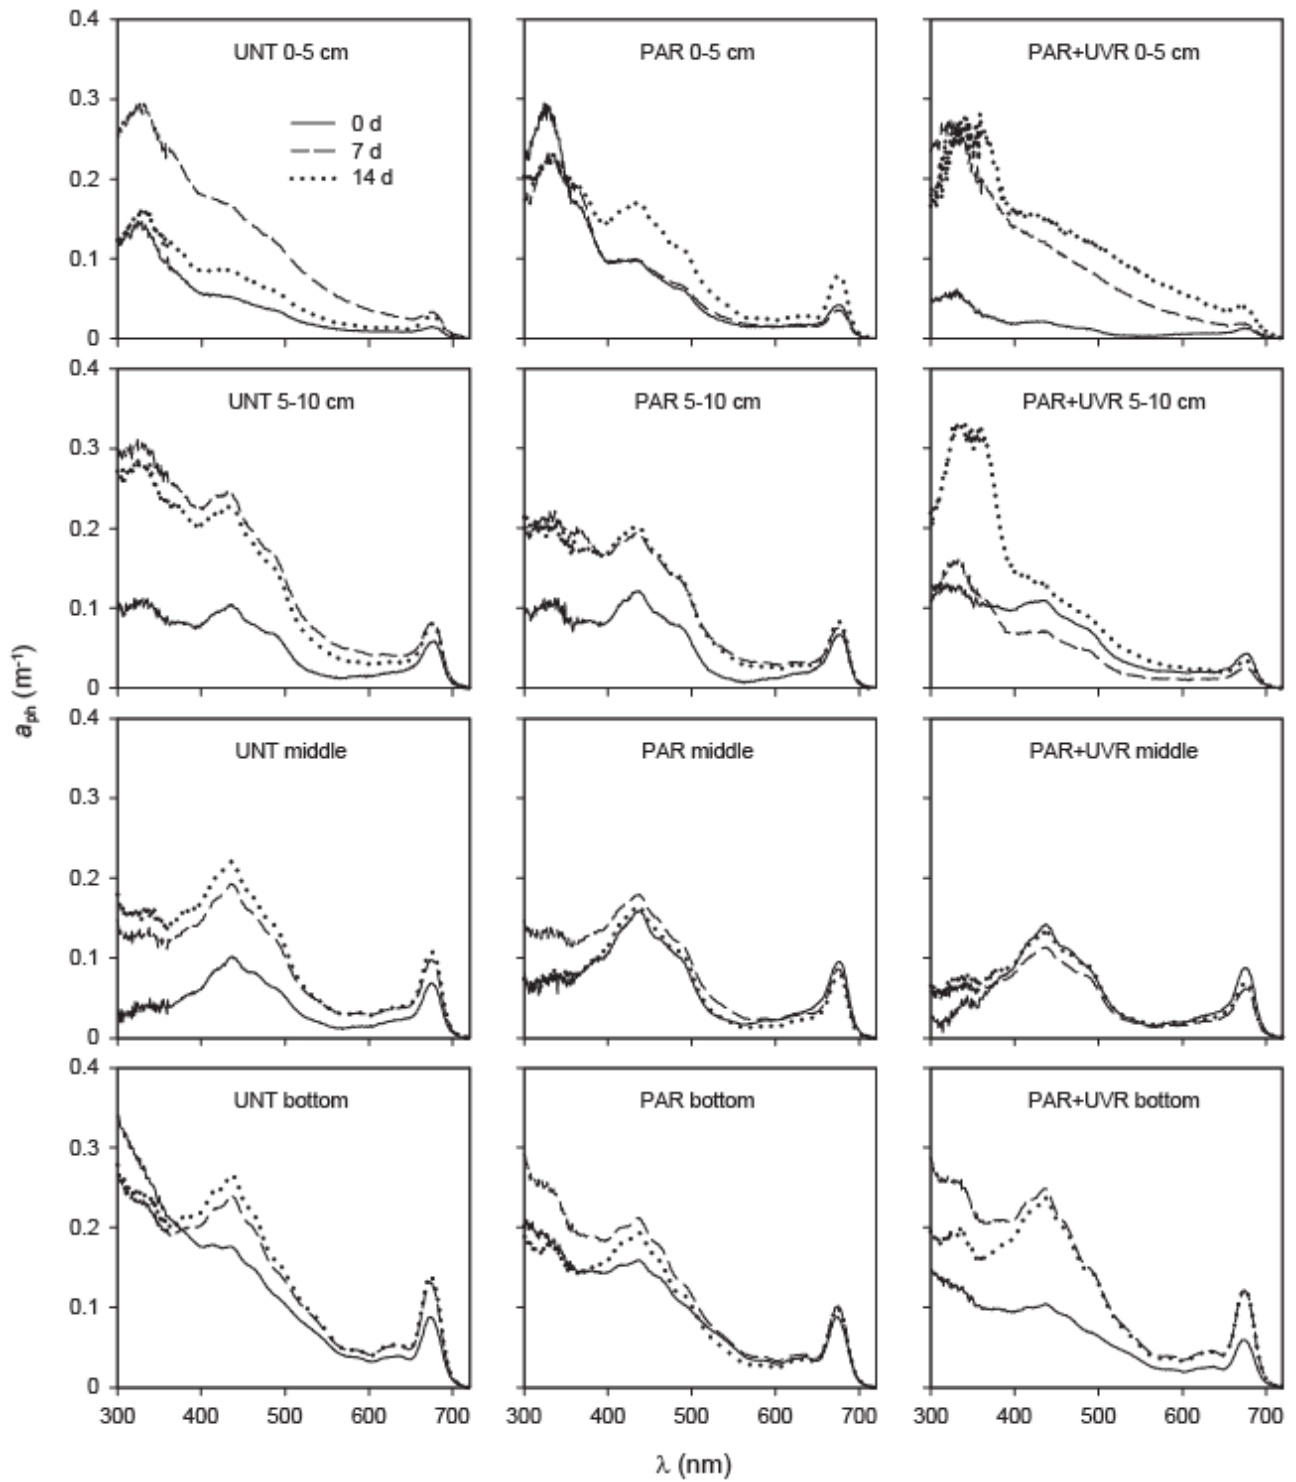

**Fig. S2.** The integrated absorption (dimensionless) of CDOM and particles ( $a_p$  algal and  $a_{nap}$  non-algal) in the layers above 10 cm (upper row) and below 10 cm (lower row) in the treatments on day 14.

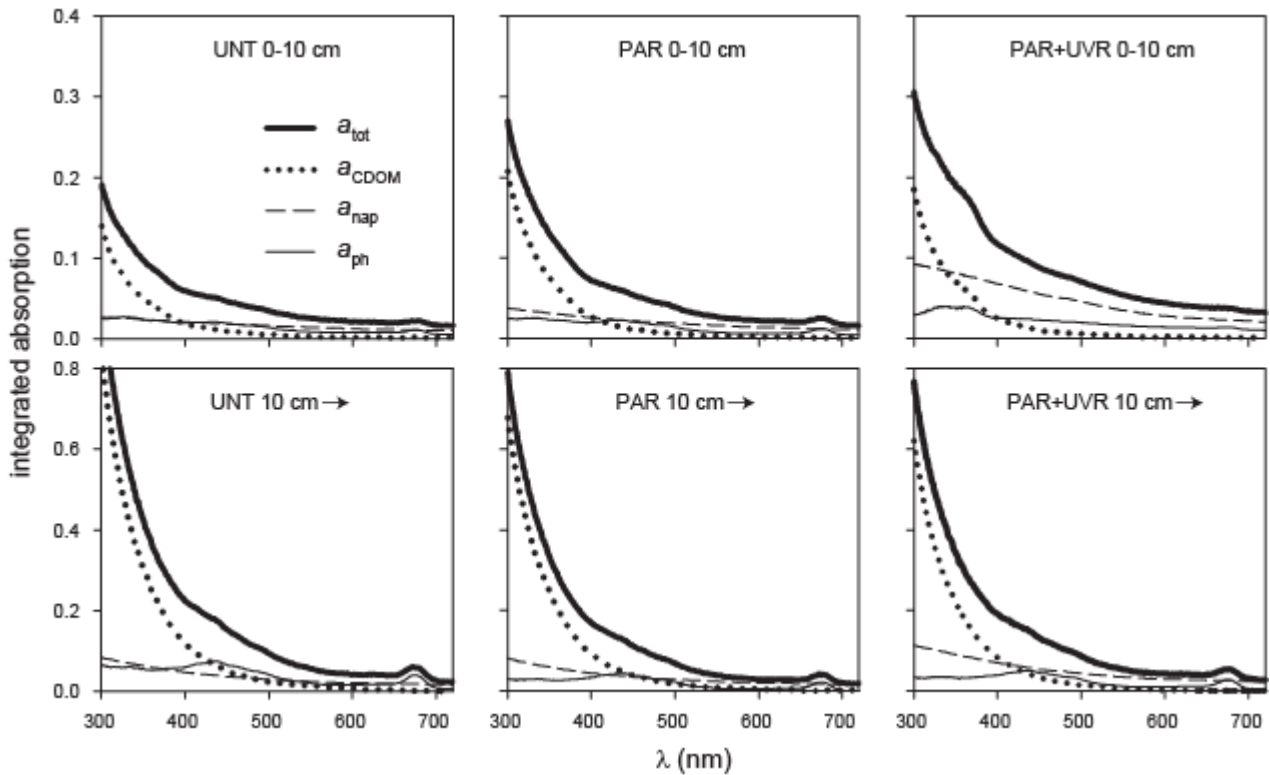

**Fig. S3.** Biomass of the three major algal groups ( $\mu\text{g C L}^{-1}$ ) in the PAR treatment and untreated ice on 14 d (A) and on 21 d (B). The values on 14 d are the means of the three replicates and PAR(+UVR) on 21 d refers to the 7 days re-exposure of PAR treatment.

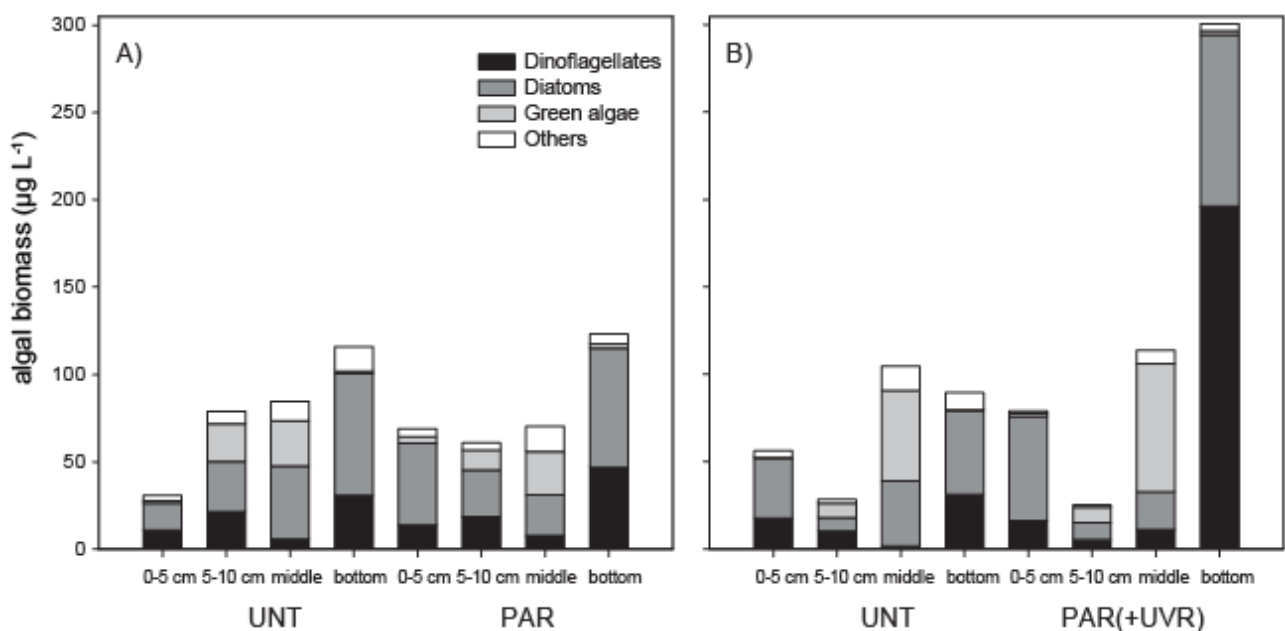

Supplement: c4pp00342j1.pdf [file c4pp00342j1.pdf]
